# Supplementary material
Source: HighWire-hosted journal article supplement (https://jnm.snmjournals.org/highwire/filestream/99810/field_highwire_adjunct_files/0/247197_Supplemental_Data.pdf)
Supplement: 247197_Supplemental_Data.pdf [file 247197_Supplemental_Data.pdf]

Radiopharmaceutical Access and Availability  
Nuclear Medicine Global Initiative

Information of answering person (Country, affiliation, name, phone, email, address)

## Nuclear Medicine Status in Country

Number of Nuclear Medicine Sites in Country:

Nuclear Medicine Sites - Government, Public:

Nuclear Medicine Sites - Private:

Nuclear Medicine Sites – Mobile Cameras:

Manufacturers / Suppliers of  $^{99m}\text{Tc}$ -generators:

Manufacturers / Suppliers of kits:

Manufacturers / Suppliers of Therapeutic Radiopharmaceuticals:

Commercial Radiopharmacies:

## Radiopharmaceuticals

### Diagnostic Radiopharmaceuticals

Please confirm availability of the following radiopharmaceuticals, source and dose

#### $^{99m}\text{Tc}$ -generators

Indicate number of sites that use in-house, or access via external radiopharmacies

Indicate source of  $^{99m}\text{Tc}$ -generators, size of generators

Indicate issues relating to access or availability of  $^{99m}\text{Tc}$ -generators

## In vivo examinations

### Brain imaging, CSF studies

- eg  $^{123}\text{I}$  IMP,  $^{99m}\text{Tc}$  HMPAO,  $^{99m}\text{Tc}$  ECD,  $^{99m}\text{Tc}$  HSA,  $^{99m}\text{Tc}$  DTPA,  $^{133}\text{Xe}$  gas,  $^{123}\text{I}$  iomazenil,  $^{99m}\text{Tc}$  RBC
  
- Indicate which tracers are available, which tracers are used for brain imaging and CSF studies, and source of tracer or doses and kits
  
  
- Typical administered dose (MBq) for each tracer
  
  
  
- Are there any issues that impact on access and availability of these tracers

### Salivary gland

- eg  $^{99m}\text{Tc}$  pertechnetate
  
- Indicate which tracers are available, which tracers are used salivary gland imaging, and source of tracer or doses)
  
- Typical administered dose (MBq) for each tracer
  
- Are there any issues that impact on access and availability of these tracers

### Thyroid gland (including thyroid carcinoma, medullary thyroid carcinoma)

- eg  $^{99m}\text{Tc}$  pertechnetate,  $^{123}\text{I}$ ,  $^{131}\text{I}$ ,  $^{124}\text{I}$ ,  $^{123}\text{I}$ -MIBG,  $^{131}\text{I}$ -MIBG
  
- Indicate which tracers are available, which tracers are used for thyroid imaging, and source of tracer or doses
  
- Typical administered dose (MBq) for each tracer
  
- Are there any issues that impact on access and availability of these tracers

### Parathyroid gland

- eg  $^{201}\text{Tl-Cl}$ ,  $^{99\text{m}}\text{Tc-99m}$  pertechnetate,  $^{123}\text{I}$ ,  $^{99\text{m}}\text{Tc-MIBI}$
- Indicate which tracers are available, which tracers are used for parathyroid imaging, and source of tracer or doses and kits
- Typical administered dose (MBq) for each tracer
- Are there any issues that impact on access and availability of these tracers

### Lung

- eg  $^{99\text{m}}\text{Tc-DTPA}$ ,  $^{81}\text{Kr}$  gas,  $^{133}\text{Xe}$  gas,  $^{99\text{m}}\text{Tc MAA}$ ,  $^{99\text{m}}\text{Tc-Technegas}$
- Indicate which tracers are available, which tracers are used for lung scans, and source of tracer or doses and kits
- Typical administered dose (MBq) for each tracer
- Are there any issues that impact on access and availability of these tracers

#### Heart (myocardial scintigraphy, blood-pool scintigraphy, first-pass)

- eg  $^{201}\text{Tl-Cl}$ ,  $^{99\text{m}}\text{Tc MIBI}$ ,  $^{99\text{m}}\text{Tc tetrofosmin}$ ,  $^{99\text{m}}\text{Tc-RBC}$
  
- Indicate which tracers are available, which tracers are used for heart scans, and source of tracer or doses and kits
  
- Typical administered dose (MBq) for each tracer
  
- Are there any issues that impact on access and availability of these tracers

#### Liver, Biliary tract

- eg  $^{99\text{m}}\text{Tc phytic acid}$ ,  $^{99\text{m}}\text{Tc sulphur colloid}$ ,  $^{99\text{m}}\text{Tc PMT}$ ,  $^{99\text{m}}\text{Tc HIDA}$  (DISIDA, Mebrofenin),  $^{99\text{m}}\text{Tc-MAA}$
  
- Indicate which tracers are available, which tracers are used for liver and biliary scans, and source of tracer or doses and kits
  
- Typical administered dose (MBq) for each tracer
  
- Are there any issues that impact on access and availability of these tracers

### Spleen, Bone marrow

- eg  $^{99m}\text{Tc}$  phytic acid,  $^{99m}\text{Tc}$  tin colloid,  $^{111}\text{In}$  chloride,  $^{99m}\text{Tc}$ -denatured RBCs
- Indicate which tracers are available, which tracers are used for spleen and bone marrow scans, and source of tracer or doses and kits
- Typical administered dose (MBq) for each tracer
- Are there any issues that impact on access and availability of these tracers

### Kidney, Urinary system

- eg  $^{99m}\text{Tc}$  DTPA,  $^{99m}\text{Tc}$  DMSA,  $^{99m}\text{Tc}$  MAG3
- Indicate which tracers are available, which tracers are used for kidney and urinary system scans, and source of tracer or doses and kits
- Typical administered dose (MBq) for each tracer
- Are there any issues that impact on access and availability of these tracers

### Adrenal gland

- eg  $^{131}\text{I}$  adosterol,  $^{131}\text{I}$  MIBG,  $^{123}\text{I}$  MIBG
- Indicate which tracers are available, which tracers are used for lung scans, and source of tracer or doses and kits
- Typical administered dose (MBq) for each tracer
- Are there any issues that impact on access and availability of these tracers

### Bone, joints

- eg  $^{99\text{m}}\text{Tc}$  MDP,  $^{99\text{m}}\text{Tc}$  HMDP,  $^{99\text{m}}\text{Tc}$  pyrophosphoric acid (PYP)
- Indicate which tracers are available, which tracers are used for bone and joint scans, and source of tracer or doses
- Typical administered dose (MBq) for each tracer
- Are there any issues that impact on access and availability of these tracers



### Digestive tract

- eg  $^{99m}\text{Tc}$  pertechnetate,  $^{99m}\text{Tc}$  RBC,  $^{99m}\text{Tc}$  sulphur colloid (gastric emptying)
- Indicate which tracers are available, which tracers are used for GI tract scans, and source of tracer or doses and kits
- Typical administered dose (MBq) for each tracer
- Are there any issues that impact on access and availability of these tracers

### Tumor

- eg  $^{67}\text{Ga}$  citrate,  $^{201}\text{Tl}$  chloride,  $^{99m}\text{Tc}$ -(V) DMSA,  $^{123}\text{I}$ -MIBG,  $^{131}\text{I}$ -MIBG
- Indicate which tracers are available, which tracers are used for tumor scans, and source of tracer or doses and kits
- Typical administered dose (MBq) for each tracer
- Are there any issues that impact on access and availability of these tracers

## Inflammation

- eg  $^{67}\text{Ga}$  citrate,  $^{111}\text{In}$  WBC,  $^{99\text{m}}\text{Tc}$  WBC
- Indicate which tracers are available, which tracers are used for inflammation scans, and source of tracer or doses and kits
- Typical administered dose (MBq) for each tracer
- Are there any issues that impact on access and availability of these tracers

## Lymph nodes, sentinel lymph nodes

- eg  $^{99\text{m}}\text{Tc}$  HSA,  $^{99\text{m}}\text{Tc}$  antimony sulphur colloid,  $^{99\text{m}}\text{Tc}$  phytic acid,  $^{99\text{m}}\text{Tc}$ -nanocolloid
- Indicate which tracers are available, which tracers are used for lung scans, and source of tracer or doses and kits
- Typical administered dose (MBq) for each tracer
- Are there any issues that impact on access and availability of these tracers

#### In-vitro studies

- eg  $^{51}\text{Cr}$  chromate,  $^{99\text{m}}\text{Tc}$  DTPA,  $^{14}\text{C}$  urea
  
- Indicate which tracers are available, which tracers are used for in vitro studies, and source of tracer or doses and kits
  
- Typical administered dose (MBq) for each tracer
  
- Are there any issues that impact on access and availability of these tracers

#### Other examinations

- Indicate which tracers are available, which tracers are used for different scans, and source of tracer or doses and kits
  
- Typical administered dose (MBq) for each tracer
  
- Are there any issues that impact on access and availability of these tracers

Please identify any diagnostic radiopharmaceuticals required but not available in your country, and indicate issues that prevent use eg access, shipping, cost, regulatory, facilities, training etc.

## Therapy by unsealed Radiopharmaceuticals

### Hyperthyroidism

- eg  $^{131}\text{I}$  - indicate which therapeutic radiopharmaceuticals are used, and source
  
- Typical administered dose (MBq) for each therapy
  
- Are there any issues that impact on access and availability of these therapeutic tracers

### Thyroid Carcinoma

- eg  $^{131}\text{I}$  - indicate which therapeutic radiopharmaceuticals are used, and source
  
- Typical administered dose (MBq) for each therapy
  
- Are there any issues that impact on access and availability of these therapeutic tracers

### Phaeochromocytoma

- eg  $^{131}\text{I}$  MIBG - indicate which therapeutic radiopharmaceuticals are used, and source
  
- Typical administered dose (MBq) for each therapy
  
- Are there any issues that impact on access and availability of these therapeutic tracers

### Neuroblastoma

- eg  $^{131}\text{I}$  MIBG - indicate which therapeutic radiopharmaceuticals are used, and source
  
- Typical administered dose (MBq) for each therapy
  
- Are there any issues that impact on access and availability of these therapeutic tracers

### Bone pain

- eg  $^{89}\text{Sr}$  choride,  $^{153}\text{Sm}$  EDTMP,  $^{223}\text{Ra}$  chloride - indicate which therapeutic radiopharmaceuticals are used, and source
  
- Typical administered dose (MBq) for each therapy
  
- Are there any issues that impact on access and availability of these therapeutic tracers

### Neuroendocrine Tumors

- eg  $^{177}\text{Lu}$  DOTATATE,  $^{177}\text{Lu}$  DOTATOC - indicate which therapeutic radiopharmaceuticals are used, and source
  
- Typical administered dose (MBq) for each therapy
  
- Are there any issues that impact on access and availability of these therapeutic tracers

## Lymphomas

- eg  $^{131}\text{I}$  Tositumumab,  $^{90}\text{Y}$  Ibritumomab tiuxetan - indicate which therapeutic radiopharmaceuticals are used, and source
- Typical administered dose (MBq) for each therapy
- Are there any issues that impact on access and availability of these therapeutic tracers

## Liver Tumors

- eg  $^{90}\text{Y}$  SIRspheres,  $^{90}\text{Y}$  glass spheres,  $^{188}\text{Re}$  spheres - indicate which therapeutic radiopharmaceuticals are used, and source
- Typical administered dose (MBq) for each therapy
- Are there any issues that impact on access and availability of these therapeutic tracers

### Polycythemia Rubra Vera

- eg  $^{32}\text{P}$  - indicate if used, and source
  
- Typical administered dose (MBq) for each therapy
  
- Are there any issues that impact on access and availability of these therapeutic tracers

### Joint Therapy

- eg  $^{90}\text{Y}$ ,  $^{188}\text{Re}$  - indicate which therapeutic radiopharmaceuticals are used, and source
  
- Typical administered dose (MBq) for each therapy
  
- Are there any issues that impact on access and availability of these therapeutic tracers

Please identify any therapeutic radiopharmaceuticals required but not available in your country, and indicate issues that prevent use eg access, shipping, cost, regulatory, facilities, training etc.







<sup>18</sup>F- other PET tracers (dementia)

- eg <sup>18</sup>F-Florbetapir, <sup>18</sup>F-Flutemetamol, <sup>18</sup>F-Florbetaben, <sup>18</sup>F-Tau agents
- indicate number of sites that use other <sup>18</sup>F-tracers (dementia)
  
- Indicate which tracers are available
  
- Typical administered dose (MBq) for dementia <sup>18</sup>F-PET tracers
  
- Clinical Indications funded for <sup>18</sup>F-PET tracers in dementia
  
- Are there any issues that impact on access and availability of <sup>18</sup>F-PET tracers in dementia

### <sup>11</sup>C-PET tracers

- eg <sup>11</sup>C-PIB, <sup>11</sup>C-methionine, <sup>11</sup>C-choline, <sup>11</sup>C-flumazenil, <sup>11</sup>C-raclopride
- indicate number of sites that use <sup>11</sup>C-tracers
  
- Indicate which tracers are available, and indications
  
- Typical administered dose (MBq) for <sup>11</sup>C-PET tracers
  
- Clinical Indications funded for <sup>11</sup>C-PET tracers
  
  
- Are there any issues that impact on access and availability of <sup>11</sup>C-PET tracers

### <sup>68</sup>Ga-PET tracers

- eg <sup>68</sup>Ga-DOTATATE, <sup>68</sup>Ga-PSMA
- indicate number of sites that use <sup>68</sup>Ga-tracers
  
- Indicate which tracers are available, and indications
  
- Typical administered dose (MBq) for <sup>68</sup>Ga-PET tracers
  
- Clinical Indications funded for <sup>68</sup>Ga-PET tracers
  
  
- Are there any issues that impact on access and availability of <sup>68</sup>Ga-PET tracers

### <sup>15</sup>O-PET tracers

- eg <sup>15</sup>O-O<sub>2</sub> gas, <sup>15</sup>O-CO gas, <sup>15</sup>O-H<sub>2</sub>O
- indicate number of sites that use <sup>15</sup>O-tracers
  
- Indicate which tracers are available, and indications
  
- Typical administered dose (MBq) for <sup>15</sup>O-PET tracers
  
- Clinical Indications funded for <sup>15</sup>O-PET tracers
  
  
- Are there any issues that impact on access and availability of <sup>15</sup>O-PET tracers

### <sup>13</sup>N-PET tracers

- eg <sup>13</sup>N-NH<sub>3</sub>, <sup>13</sup>N-other tracer
- indicate number of sites that use <sup>13</sup>N-tracers
  
- Indicate which tracers are available, and indications
  
- Typical administered dose (MBq) for <sup>13</sup>N-PET tracers
  
- Clinical Indications funded for <sup>13</sup>N-PET tracers
  
  
- Are there any issues that impact on access and availability of <sup>13</sup>N-PET tracers

other PET tracers

- Indicate which other PET tracers are available, which clinical indications they are used for, and source of tracer or doses and kits
  
- Typical administered dose (MBq) for each tracer
  
- Are there any issues that impact on access and availability of these tracers

Please identify any PET tracers required, but not available in your country, and indicate issues that prevent use eg access, shipping, cost, regulatory, facilities, training etc.
